# Supplementary material for: Clinical implementation of preemptive pharmacogenomics in psychiatry
Source: PubMed Central journal article supplement — eBioMedicine. 2024 Feb 16;101:105009. doi: 10.1016/j.ebiom.2024.105009 (PMC10879811; doi:10.1016/j.ebiom.2024.105009), 2024-02-16
Supplement: mmc1.pdf [file mmc1.pdf]

## Supplementary Information

### Clinical implementation of preemptive pharmacogenomics in psychiatry

Maria Skokou <sup>1,\*</sup>, Kariofyllis Karamperis <sup>2,3,\*</sup>, Margarita-Ioanna Koufaki <sup>2,3,\*</sup>, Evangelia-Eirini Tsermpini <sup>2,#</sup>, Maria-Theodora Pandi <sup>4,#</sup>, Stavroula Siamoglou <sup>2,#</sup>, Panagiotis Ferentinos <sup>5</sup>, Marina Bartsakoulia <sup>2</sup>, Theodora Katsila <sup>2</sup>, Christina Mitropoulou <sup>3</sup>, George P. Patrinos <sup>2,4,6,7,\$</sup>; on behalf of the Consortium of the PREPARE study in Greece

<sup>1</sup> University of Patras General Hospital, Psychiatric Clinic, Patras, Greece

<sup>2</sup> University of Patras, School of Health Sciences, Department of Pharmacy, Laboratory of Pharmacogenomics and Individualized Therapy, Patras, Greece

<sup>3</sup> The Golden Helix Foundation, London, UK

<sup>4</sup> Erasmus University Medical Center, Faculty of Medicine and Health Sciences, Department of Pathology, Bioinformatics Unit, Rotterdam, the Netherlands

<sup>5</sup> ATIKON General University hospital, 2<sup>nd</sup> Psychiatric Clinic, Athens, Greece

<sup>6</sup> United Arab Emirates University, College of Medicine and Health Sciences, Department of Genetics and Genomics, Al-Ain, Abu Dhabi, UAE

<sup>7</sup> United Arab Emirates University, Zayed Center for Health Sciences, Al-Ain, Abu Dhabi, UAE

\* These authors are considered joint first authors

# These authors are considered joint second authors

## **Consortium of the PREPARE study in Greece (in alphabetical order)**

### **1. University of Patras General hospital, Psychiatric Clinic, Patras, Greece**

Konstantinos Assimakopoulos, Eleni Georgila, Philippos Gourzis, Aikaterini Karaivazoglou, Olympia Prodromaki, George Rigas, Georgia Voukelatou, Vassiliki Zacharopoulou

### **2. University of Patras, School of Health Sciences, Department of Pharmacy, Laboratory of Pharmacogenomics and Individualized Therapy, Patras, Greece**

Evangelia Barba, Konstantina Chalikiopoulou, Dimitra Dedousi, Georgia Emmanouil, Panagiotis Giannopoulos, Ouliana Ivantsik, Marina Kalogeropoulou, Manoussos E. Kambouris, Filippos Kanellakis, Alexandra Kolliopoulou, Panagiotis Kollios, Zoi Kordou, Ioannis Liopetas, Efrossyni Mendrinou, Konstantinos Mitropoulos, Georgia-Chryssa Samiou, Theano Stamopoulou, Andreas Stathoulas, Apostolos Stratopoulos, Athina Tsikrika

### **3. ATIKON General University hospital, 2<sup>nd</sup> Psychiatric Clinic, Athens, Greece**

Athanassios Douzenis, Charilaos Gerassimou

### **4. University of Piraeus, Economics Department, Piraeus, Greece**

Maria-Angeliki Voziki, Athanassios Vozikis

**Table S1. Costs of medical interventions to treat ADRs.**

| <b>Medical Interventions*</b>                           | <b>Costs (€)**</b> |
|---------------------------------------------------------|--------------------|
| <b>Adverse Drug Reactions</b>                           |                    |
| Weight gain                                             | 2,599              |
| Extrapyramidal disorder                                 | 1,670              |
| Gastrointestinal pain                                   | 323                |
| Fatigue                                                 | 1,245              |
| Mania                                                   | 2,568              |
| Musculoskeletal and connective tissue disorders         | 1,203              |
| Tremor                                                  | 1,152              |
| Skin disorder                                           | 181                |
| Suicidal Attempt                                        | 2,568              |
| Sepsis                                                  | 2,316              |
| Surgical procedure                                      | 3,000              |
| Diarrhea                                                | 323                |
| <b>Examination Costs</b>                                |                    |
| CT upper and lower abdomen                              | 71.11              |
| Echocardiogram                                          | 70                 |
| Electrocardiogram                                       | 10                 |
| <b>Laboratory Tests costs</b>                           |                    |
| CPK                                                     | 5.02               |
| Prolactine blood test                                   | 12.38              |
| <b>Follow up assessments</b>                            |                    |
| Therapist consultations                                 | 48                 |
| Visit to General practitioner/neurologist, cardiologist | 10                 |
| <b>Genetic testing costs</b>                            |                    |
| PGx testing                                             | 120                |

\*It refers to all procedures done due to adverse events and adverse drug reactions. \*\* All costs data derived from Greek Ministry of Health, EOPPY, DRGs official page: <http://kenicd.e-healthnet.gr/%CE%91%CF%81%CF%87%CE%B9%CE%BA%CE%B7.aspx>  
CT: computerised tomography, Echo: echocardiogram, CPK: creatine phosphokinase, PGx: Pharmacogenomics

**Table S2.** Frequency of ADRs, stratified by their respective NCI-CTCAE severity grade on the entire study population. Each patient could have presented with multiple ADRs that are included in this table.

|                                                                | <b>Control</b><br>N = 528 <sup>l</sup> | <b>PGx-guided</b><br>N = 545 <sup>l</sup> | <b>p-value</b> <sup>2</sup> | <b>q-value</b> <sup>3</sup> |
|----------------------------------------------------------------|----------------------------------------|-------------------------------------------|-----------------------------|-----------------------------|
| Cardiac disorders Grade 1                                      | 1 (0.19%)                              | 0 (0.00%)                                 | 0.5                         | 0.8                         |
| Cardiac disorders Grade 2-5                                    | 3 (0.57%)                              | 0 (0.00%)                                 | 0.12                        | 0.4                         |
| Ear and labyrinth disorders Grade 1                            | 0 (0.00%)                              | 2 (0.37%)                                 | 0.5                         | 0.8                         |
| Ear and labyrinth disorders Grade 2-5                          | 0 (0.00%)                              | 1 (0.18%)                                 | >0.9                        | >0.9                        |
| Endocrine disorders Grade 2-5                                  | 1 (0.19%)                              | 0 (0.00%)                                 | 0.5                         | 0.8                         |
| Eye disorders Grade 1                                          | 0 (0.00%)                              | 2 (0.37%)                                 | 0.5                         | 0.8                         |
| Eye disorders Grade 2-5                                        | 0 (0.00%)                              | 1 (0.18%)                                 | >0.9                        | >0.9                        |
| Gastrointestinal disorders Grade 1                             | 19 (3.60%)                             | 11 (2.02%)                                | 0.12                        | 0.4                         |
| Gastrointestinal disorders Grade 2-5                           | 15 (2.84%)                             | 4 (0.73%)                                 | 0.009                       | 0.076                       |
| General disorders and administration site conditions Grade 1   | 2 (0.38%)                              | 3 (0.55%)                                 | >0.9                        | >0.9                        |
| General disorders and administration site conditions Grade 2-5 | 11 (2.08%)                             | 3 (0.55%)                                 | 0.027                       | 0.2                         |
| Immune system disorders Grade 2-5                              | 0 (0.00%)                              | 1 (0.18%)                                 | >0.9                        | >0.9                        |
| Infections and infestations Grade 2-5                          | 2 (0.38%)                              | 0 (0.00%)                                 | 0.2                         | 0.7                         |
| Investigations Grade 1                                         | 29 (5.49%)                             | 25 (4.59%)                                | 0.5                         | 0.8                         |
| Investigations Grade 2-5                                       | 26 (4.92%)                             | 28 (5.14%)                                | 0.9                         | >0.9                        |
| Metabolism and nutrition disorders Grade 1                     | 5 (0.95%)                              | 4 (0.73%)                                 | 0.7                         | >0.9                        |
| Metabolism and nutrition disorders Grade 2-5                   | 5 (0.95%)                              | 2 (0.37%)                                 | 0.3                         | 0.8                         |
| Musculoskeletal and connective tissue disorders Grade 1        | 0 (0.00%)                              | 1 (0.18%)                                 | >0.9                        | >0.9                        |
| Musculoskeletal and connective tissue disorders Grade 2-5      | 1 (0.19%)                              | 11 (2.02%)                                | 0.004                       | 0.066                       |
| Neoplasms Grade 2-5                                            | 0 (0.00%)                              | 1 (0.18%)                                 | >0.9                        | >0.9                        |
| Nervous system disorders Grade 1                               | 17 (3.22%)                             | 24 (4.40%)                                | 0.3                         | 0.8                         |
| Nervous system disorders Grade 2-5                             | 34 (6.44%)                             | 15 (2.75%)                                | 0.004                       | 0.066                       |
| Psychiatric disorders Grade 1 *                                | 17 (3.22%)                             | 8 (1.47%)                                 | 0.057                       | 0.3                         |

|                                                              | <b>Control</b><br>N = 528 <sup>1</sup> | <b>PGx-guided</b><br>N = 545 <sup>1</sup> | <b>p-value</b> <sup>2</sup> | <b>q-value</b> <sup>3</sup> |
|--------------------------------------------------------------|----------------------------------------|-------------------------------------------|-----------------------------|-----------------------------|
| Psychiatric disorders Grade 2-5 *                            | 14 (2.65%)                             | 3 (0.55%)                                 | 0.006                       | 0.066                       |
| Renal and urinary disorders Grade 1                          | 1 (0.19%)                              | 2 (0.37%)                                 | >0.9                        | >0.9                        |
| Renal and urinary disorders Grade 2-5                        | 4 (0.76%)                              | 1 (0.18%)                                 | 0.2                         | 0.7                         |
| Reproductive system and breast disorders Grade 1             | 2 (0.38%)                              | 4 (0.73%)                                 | 0.7                         | >0.9                        |
| Reproductive system and breast disorders Grade 2-5           | 8 (1.52%)                              | 3 (0.55%)                                 | 0.12                        | 0.4                         |
| Respiratory, thoracic and mediastinal disorders<br>Grade 2-5 | 0 (0.00%)                              | 2 (0.37%)                                 | 0.5                         | 0.8                         |
| Skin and subcutaneous tissue disorders Grade 1               | 3 (0.57%)                              | 4 (0.73%)                                 | >0.9                        | >0.9                        |
| Skin and subcutaneous tissue disorders Grade 2-5             | 1 (0.19%)                              | 0 (0.00%)                                 | 0.5                         | 0.8                         |
| Social circumstances-related disorders Grade 1               | 0 (0.00%)                              | 1 (0.18%)                                 | >0.9                        | >0.9                        |
| Surgery and medical procedure-related disorders<br>Grade 1   | 0 (0.00%)                              | 2 (0.37%)                                 | 0.5                         | 0.8                         |
| Vascular disorders Grade 2-5                                 | 0 (0.00%)                              | 1 (0.18%)                                 | >0.9                        | >0.9                        |

<sup>1</sup>n (%)

<sup>2</sup>Fisher's exact test; Pearson's Chi-squared test

<sup>3</sup>Benjamini & Hochberg correction for multiple testing

\* Psychiatric disorders symptoms considered as ADRs include: Agitation, Anorgasmia, Anxiety, Confusion, Delayed orgasm, Delirium, Delusions, Depression, Euphoria, Hallucinations, Insomnia, decreased/increased Libido, Mania, Personality change, Psychosis, Restlessness, Suicidal ideation, Suicide attempt

**Table S3.** Frequency of ADRs, stratified by their respective NCI-CTCAE severity grade within actionable patients. Each patient could have presented with multiple ADRs that are included in this table.

|                                                                | Control,<br>N = 126 <sup>1</sup> | PGx-guided,<br>N = 135 <sup>1</sup> | p-value <sup>2</sup> | q-value <sup>3</sup> |
|----------------------------------------------------------------|----------------------------------|-------------------------------------|----------------------|----------------------|
| Gastrointestinal disorders Grade 1                             | 6 (4.76%)                        | 5 (3.70%)                           | 0.7                  | >0.9                 |
| Gastrointestinal disorders Grade 2-5                           | 4 (3.17%)                        | 1 (0.74%)                           | 0.2                  | 0.6                  |
| General disorders and administration site conditions Grade 2-5 | 6 (4.76%)                        | 1 (0.74%)                           | 0.059                | 0.3                  |
| Immune system disorders Grade 2-5                              | 0 (0.00%)                        | 1 (0.74%)                           | >0.9                 | >0.9                 |
| Investigations Grade 1                                         | 3 (2.38%)                        | 7 (5.19%)                           | 0.3                  | 0.8                  |
| Investigations Grade 2-5                                       | 8 (6.35%)                        | 5 (3.70%)                           | 0.3                  | 0.8                  |
| Metabolism and nutrition disorders Grade 1                     | 0 (0.00%)                        | 1 (0.74%)                           | >0.9                 | >0.9                 |
| Metabolism and nutrition disorders Grade 2-5                   | 1 (0.79%)                        | 1 (0.74%)                           | >0.9                 | >0.9                 |
| Musculoskeletal and connective tissue disorders Grade 2-5      | 0 (0.00%)                        | 1 (0.74%)                           | >0.9                 | >0.9                 |
| Neoplasms Grade 2-5                                            | 0 (0.00%)                        | 1 (0.74%)                           | >0.9                 | >0.9                 |
| Nervous system disorders Grade 1                               | 2 (1.59%)                        | 4 (2.96%)                           | 0.7                  | >0.9                 |
| Nervous system disorders Grade 2-5                             | 10 (7.94%)                       | 2 (1.48%)                           | 0.013                | 0.12                 |
| <b>Psychiatric disorders Grade 1</b>                           | <b>8 (6.35%)</b>                 | <b>0 (0.00%)</b>                    | <b>0.003</b>         | <b>0.047</b>         |
| Psychiatric disorders Grade 2-5                                | 6 (4.76%)                        | 2 (1.48%)                           | 0.2                  | 0.6                  |
| Renal and urinary disorders Grade 2-5                          | 1 (0.79%)                        | 0 (0.00%)                           | 0.5                  | >0.9                 |
| Reproductive system and breast disorders Grade 1               | 0 (0.00%)                        | 1 (0.74%)                           | >0.9                 | >0.9                 |
| Reproductive system and breast disorders Grade 2-5             | 4 (3.17%)                        | 0 (0.00%)                           | 0.053                | 0.3                  |
| Skin and subcutaneous tissue disorders Grade 1                 | 2 (1.59%)                        | 2 (1.48%)                           | >0.9                 | >0.9                 |

<sup>1</sup>n (%)

<sup>2</sup>Pearson's Chi-squared test; Fisher's exact test

<sup>3</sup>Benjamini & Hochberg correction for multiple testing

**Table S4.** Number of patients receiving at least 2 antipsychotic drugs.

|                         | <b>Control</b>                                   | <b>PGx-guided</b>                                | <b>p-value<sup>2</sup></b> |
|-------------------------|--------------------------------------------------|--------------------------------------------------|----------------------------|
| Entire study population | <b>N = 529<sup>1</sup></b><br><b>98 (18.53%)</b> | <b>N = 547<sup>1</sup></b><br><b>71 (12.98%)</b> | <b>0.012</b>               |
| Actionable patients     | N = 126 <sup>1</sup><br>20 (15.87%)              | N = 136 <sup>1</sup><br>15 (11.03%)              | 0.2                        |

<sup>1</sup>n (%)

<sup>2</sup>Pearson's Chi-squared test
